# Supplementary material for: Generating High-Resolution CT Slices from Two Image Series Using Deep-Learning-Based Resolution Enhancement Methods
Source: MDPI journal article supplement (doi:10.3390/diagnostics12112725), 2022-11-08
Supplement: s1 [file s1]

Table S1, Parameters of CT scanners of each case

| ShorterId     | Manufacturer | Model Name               | Software Versions | KVP | XRayTube<br>Current | ConvolutionKernel |                   |                     |
|---------------|--------------|--------------------------|-------------------|-----|---------------------|-------------------|-------------------|---------------------|
|               |              |                          |                   |     |                     | Thin-slice Axial  | Thick-slice Axial | Thick-slice Coronal |
| Training001   | TOSHIBA      | Aquilion                 | V3.35ER007        | 120 | 190                 | FC14              | FC86              | FC14                |
| Training002   | TOSHIBA      | Aquilion                 | V3.35ER007        | 120 | 180                 | FC14              | FC86              | FC14                |
| Training003   | Philips      | iCT 256                  | 3.2.5.19001       | 120 | 414                 | B                 | YB                | B                   |
| Training004   | Philips      | iCT 256                  | 3.2.5.19001       | 120 | 226                 | B                 | B                 | B                   |
| Training005   | Philips      | iCT 256                  | 3.2.5.19001       | 120 | 212                 | B                 | YB                | B                   |
| Training006   | TOSHIBA      | Aquilion                 | V3.35ER007        | 120 | 175                 | FC14              | FC86              | FC14                |
| Training007   | TOSHIBA      | Aquilion                 | V3.35ER007        | 120 | 182                 | FC14              | FC86              | FC14                |
| Training008   | Philips      | Brilliance 64            | 3.5.5             | 120 | 238                 | B                 | B                 | B                   |
| Training009   | TOSHIBA      | Aquilion                 | V3.35ER007        | 120 | 210                 | FC14              | FC14              | FC14                |
| Training010   | TOSHIBA      | Aquilion                 | V3.35ER007        | 120 | 193                 | FC14              | FC14              | FC14                |
| Training011   | TOSHIBA      | Aquilion                 | V3.35ER007        | 120 | 171                 | FC14              | FC14              | FC14                |
| Validation001 | Philips      | Brilliance 64            | 3.5.5             | 120 | 171                 | A                 | YB                | A                   |
| Validation002 | Philips      | Brilliance 64            | 3.5.5             | 120 | 157                 | B                 | B                 | B                   |
| Testing001    | SIEMENS      | SOMATOM Definition Flash | syngo CT VA48A    | 100 | 1236                | I50f2             | I70f2             | I31f2               |
| Testing002    | SIEMENS      | SOMATOM Definition Flash | syngo CT VA48A    | 120 | 986                 | I50f2             | I70f2             | I31f2               |
| Testing003    | Philips      | iCT 256                  | 3.2.5.19001       | 120 | 262                 | B                 | YB                | B                   |
| Testing004    | SIEMENS      | SOMATOM Definition Flash | syngo CT VA48A    | 120 | 559                 | I31f2             | I70f2             | I31f2               |
| Testing005    | SIEMENS      | SOMATOM Definition Flash | syngo CT VA48A    | 120 | 1168                | I50f2             | I31f2             | I31f2               |

|            |         |                          |                |     |     |      |      |      |
|------------|---------|--------------------------|----------------|-----|-----|------|------|------|
| Testing006 | SIEMENS | Sensation Cardiac 64     | syngo CT 2006A | 120 | 56  | B50f | B60f | B60f |
| Testing007 | SIEMENS | SOMATOM Definition Flash | syngo CT VA48A | 120 | 164 | B31f | B30f | B31f |
| Testing008 | SIEMENS | SOMATOM Definition Flash | syngo CT VA48A | 120 | 164 | B31f | B30f | B31f |
| Testing009 | SIEMENS | SOMATOM Definition Flash | syngo CT VA48A | 120 | 164 | B31f | B30f | B31f |
| Testing010 | SIEMENS | SOMATOM Definition Flash | syngo CT VA48A | 120 | 164 | B31f | B30f | B31f |
| Testing011 | SIEMENS | SOMATOM Definition Flash | syngo CT VA48A | 120 | 164 | B31f | B30f | B31f |
| Testing012 | SIEMENS | SOMATOM Definition Flash | syngo CT VA48A | 120 | 164 | B31f | B30f | B31f |
| Testing013 | SIEMENS | SOMATOM Definition Flash | syngo CT VA48A | 120 | 164 | B31f | B30f | B31f |
| Testing014 | SIEMENS | SOMATOM Definition Flash | syngo CT VA48A | 120 | 164 | B31f | B30f | B31f |
| Testing015 | Philips | iCT 256                  | 3.2.5.19001    | 120 | 60  | B    | B    | B    |
| Testing016 | SIEMENS | SOMATOM Definition Flash | syngo CT VA48A | 120 | 164 | B31f | B30f | B31f |
| Testing017 | SIEMENS | SOMATOM Definition Flash | syngo CT VA48A | 120 | 164 | B31f | B30f | B31f |
| Testing018 | SIEMENS | Sensation Cardiac 64     | syngo CT 2006A | 120 | 56  | B50f | B60f | B60f |
| Testing019 | SIEMENS | SOMATOM Definition Flash | syngo CT VA48A | 120 | 164 | B31f | B30f | B31f |
| Testing020 | SIEMENS | Sensation Cardiac 64     | syngo CT 2006A | 120 | 84  | B50f | B60f | B60f |
| Testing021 | SIEMENS | SOMATOM Definition Flash | syngo CT VA48A | 120 | 164 | B31f | B30f | B31f |
| Testing022 | SIEMENS | SOMATOM Definition Flash | syngo CT VA48A | 120 | 164 | B31f | B30f | B31f |

---
